# Supplementary material
Source: Research Square preprint supplement (doi:10.21203/rs.3.rs-9155168/v1)
Supplement: Supplementary file 1 [file 4d36ac0ade42c263a8930918.docx]

**Table S1 FVC value and change from baseline (Volume/L)**

| **Week** | **Low-dose** | | **Medium-dose** | | **High-dose** | |
| --- | --- | --- | --- | --- | --- | --- |
| **Mean** | **±SD** | **Mean** | **±SD** | **Mean** | **±SD** |
| **W0** | 2.837 | 0.903 | 2.950 | 1.041 | 2.413 | 0.648 |
| **W12** | 2.800 | 0.700 | 2.693 | 1.091 | 2.407 | 0.626 |
| **W12-W0** | -0.037(-1.3%) | 0.214 | -0.257(-8.71%) | 0.050 | -0.007(-0.29%) | 0.049 |
| **W24** | 2.753 | 0.700 | 2.760 | 1.142 | 2.470 | 0.720 |
| **W24-W0** | -0.083(-2.93%) | 0.216 | -0.190(-6.44%) | 0.144 | 0.057(**2.36%**) | 0.072 |

The percentages in brackets represent the percentage change compared to the baseline. W0represent baseline

**Table S2 FEV1 value and change from baseline (Volume/L)**

| **Week** | **Low-dose** | | **Medium-dose** | | **High-dose** | |
| --- | --- | --- | --- | --- | --- | --- |
| **Mean** | **±SD** | **Mean** | **±SD** | **Mean** | **±SD** |
| **W0** | 2.163 | 0.437 | 2.403 | 0.715 | 2.030 | 0.445 |
| **W12** | 2.227 | 0.272 | 2.120 | 0.923 | 2.110 | 0.480 |
| **W12-W0** | 0.063 | 0.227 | -0.283 | 0.224 | **0.080(3.94%**) | 0.061 |
| **W24** | 2.010 | 0.200 | 2.203 | 0.796 | 2.083 | 0.544 |
| **W24-W0** | -0.153 | 0.330 | -0.200 | 0.082 | **0.053**(**2.61%**) | 0.104 |

W0represent baseline

**Table S3 FEV1/FVC value and change from baseline (%)**

| **Week** | **Low-dose** | | **Medium-dose** | | **High-dose** | |
| --- | --- | --- | --- | --- | --- | --- |
| **mean** | **±SD** | **mean** | **±SD** | **mean** | **±SD** |
| **W0** | 78.647 | 12.587 | 82.787 | 6.256 | 84.683 | 5.629 |
| **W12** | 81.423 | 10.641 | 77.943 | 3.746 | 88.303 | 5.800 |
| **W12-W0** | 2.777 | 5.144 | -4.843 | 9.993 | **3.620** | 1.409 |
| **W24** | 75.153 | 12.492 | 81.233 | 4.874 | 84.990 | 4.039 |
| **W24-W0** | -3.493 | 6.584 | -1.553 | 2.721 | **0.307** | 1.767 |

W0represent baseline

**Table S4 6-minute walk test and change from baseline (Distance/m)**

| **Week** | **Low-dose** | | **Medium-dose** | | **High-dose** | |
| --- | --- | --- | --- | --- | --- | --- |
| **mean** | **±SD** | **mean** | **±SD** | **mean** | **±SD** |
| **W0** | 387.33 | 36.07 | 318.83 | 93.37 | 401.67 | 80.98 |
| **W1** | 401.67 | 20.21 | 330.67 | 88.55 | 406.50 | 97.34 |
| **W1-W0** | 14.33 | 22.28 | 11.83 | 12.71 | **4.83** | 75.75 |
| **W4** | 425.00 | 21.79 | 319.67 | 94.69 | 449.67 | 60.50 |
| **W4-W0** | 37.67 | 21.36 | 0.83 | 10.42 | **48.00** | 64.90 |
| **W12** | 411.67 | 11.55 | 327.67 | 111.16 | 447.33 | 49.81 |
| **W12-W0** | 24.33 | 37.17 | 8.83 | 29.88 | **45.67** | 71.67 |
| **W24** | 417.63 | 8.79 | 294.33 | 140.65 | 485.33 | 117.92 |
| **W24-W0** | 30.30 | 27.45 | -24.50 | 60.08 | **83.67** | 90.67 |

W0represent baseline

**Table S5 SGRQ score and change from baseline**

| **Week** | **Low-dose** | | **Medium-dose** | | **High-dose** | |
| --- | --- | --- | --- | --- | --- | --- |
| **mean** | **±SD** | **mean** | **±SD** | **mean** | **±SD** |
| **W0** | 22.693 | 8.742 | 39.436 | 18.872 | 37.771 | 10.934 |
| **W1** | 31.943 | 30.141 | 37.563 | 19.097 | 35.210 | 18.579 |
| **W1-W0** | 9.249 | 26.435 | **-1.873** | 1.854 | **-2.561** | 7.646 |
| **W4** | 22.927 | 19.475 | 36.466 | 20.372 | 26.238 | 9.539 |
| **W4-W0** | 0.234 | 13.884 | **-2.970** | 3.543 | **-11.534** | 8.250 |
| **W12** | 24.397 | 19.823 | 28.403 | 20.542 | 38.967 | 27.109 |
| **W12-W0** | 1.704 | 13.343 | **-11.033** | 16.078 | 1.196 | 26.376 |
| **W24** | 25.009 | 21.471 | 46.558 | 27.488 | 33.022 | 22.130 |
| **W24-W0** | 2.316 | 15.703 | 7.122 | 26.144 | **-4.749** | 19.824 |

W0represent baseline

**Table S6 The percentage of DLCO to the predicted value and change from baseline (%)**

|  | **Low-dose** | | **Medium-dose** | | **High-dose** | |
| --- | --- | --- | --- | --- | --- | --- |
| **Week** | **mean** | **±SD** | **mean** | **±SD** | **mean** | **±SD** |
| **W0** | 40.540 | 5.091 | 39.667 | 7.024 | 50.500 | 2.343 |
| **W12** | 44.667 | 10.693 | 35.667 | 11.590 | 44.850 | 5.869 |
| **W12-W0** | **4.127** | 13.501 | -4.000 | 14.526 | -4.900 | 3.111 |
| **W24** | 45.000 | 7.071 | 40.833 | 9.929 | 50.137 | 4.972 |
| **W24-W0** | **7.390** | 6.491 | 1.167 | 8.098 | -0.363 | 6.508 |

W0represent baseline

**Table S7 VA value and change from baseline (Volume/L)**

|  | **Low-dose** | | **Medium-dose** | | **High-dose** | |
| --- | --- | --- | --- | --- | --- | --- |
| **Week** | **mean** | **±SD** | **mean** | **±SD** | **mean** | **±SD** |
| **W0** | 3.607 | 0.950 | 3.833 | 1.533 | 3.403 | 1.122 |
| **W12** | 3.717 | 0.770 | 3.813 | 1.330 | 3.440 | 0.806 |
| **W12-W0** | **0.110** | 0.295 | -0.020 | 0.320 | -0.450 | 0.240 |
| **W24** | 4.225 | 0.601 | 4.197 | 0.993 | 3.237 | 0.524 |
| **W24-W0** | **0.085** | 0.290 | 0.363 | 0.715 | -0.167 | 0.625 |

W0represent baseline

**Table S8 HRCT score and change from baseline**

|  | **Low-dose** | | **Medium-dose** | | **High-dose** | |
| --- | --- | --- | --- | --- | --- | --- |
| **Week** | **mean** | **±SD** | **mean** | **±SD** | **mean** | **±SD** |
| **W0** | 4.560 | 1.018 | 4.667 | 1.453 | 3.777 | 0.193 |
| **W12** | 4.443 | 1.074 | 3.670 | 1.160 | 4.000 | 0.670 |
| **W12-W0** | -0.117 | 0.202 | **-0.997** | 1.458 | 0.223 | 0.693 |
| **W24** | 4.663 | 0.670 | 3.447 | 1.072 | 4.000 | 0.670 |
| **W24-W0** | 0.103 | 0.384 | **-1.220** | 1.267 | 0.223 | 0.693 |

W0represent baseline
