# Supplementary material
Source: Research Square preprint supplement (doi:10.21203/rs.3.rs-9155168/v1)
Supplement: Supplementary file 2 [file 8946daebb305c40d84beae68.docx]

**Effect of human umbilical cord-derived mesenchymal stromal cells on idiopathic pulmonary fibrosis: a phase I clinical trial**

**Supplementary information:**

1. **The inclusion and exclusion criteria**

**1.1 Inclusion criteria:**

(1) No gender restrictions, aged 40-80 years old (inclusive of the boundaries).

(2) Confirmed IPF patients diagnosed according to the "2022 ATS/ERS/JRS/ALAT Clinical Practice Guidelines: Adult Idiopathic Pulmonary Fibrosis and Progressive Pulmonary Fibrosis".

(3) The lung carbon monoxide diffusion capacity (DLCO) to predicted value (corrected by Hb level) ratio ≥ 30%, the forced vital capacity (FVC) to predicted value ratio ≥ 50%, and the forced expiratory volume in the first second (FEV1) to FVC ratio ≥ 0.70.

(4) Patients first diagnosed with IPF or patients have a stable condition for at least 4 weeks during the screening process.

(5) The subjects who are willing to participate in the trial according to the requirements of the plan, understand and sign the informed consent form.

**1.2 Exclusion criteria:**

(1) Those who are allergic to any component of investigational drug.

(2) Suffering from interstitial lung disease other than IPF.

(3) The subjects had any of the following pulmonary diseases during the screening period: asthma, pulmonary embolism, pneumothorax, etc.; lung cancer, obliterative bronchiolitis or other active pulmonary diseases; those with a known history of immune system disorders (such as thymic diseases, history of systemic lupus erythematosus); those with other acquired or congenital immune deficiency diseases, or those with a history of organ transplantation.

(4) The chest HRCT scan showed that the area of emphysema was greater than that of fibrosis during the screening period.

(5) Have received stem cell treatment previously, or were intolerant to cell therapy

(6) Patients who have used any of the following drugs within the past 3 months before screen: mycophenolate mofetil, cyclophosphamide, tacrolimus, JAK inhibitors which inhibit cell proliferation or non-biological drug preparations with immunosuppressive or immunomodulatory effects, and herbal medicines with immunomodulatory effects; patients who have used low-dose corticosteroids (≤ 10 mg/day of prednisone or equivalent doses of similar drugs) were allowed to be included.

(7) Screening for patients who have used biological agents such as rituximab, TNF-α monoclonal antibody, and IFN-γ monoclonal antibody within the past 6 months

(8) Screening for patients who have used anticoagulant drugs, sildenafil, bosentan, masitinib, imatinib and other drugs for treating IPF within the past 4 weeks.

(9) Screening for patients who have participated in intervention clinical studies within the previous 3 months or within the 5 drug half-lives (whichever is longer)

(10) Screening for those who have been hospitalized for acute exacerbation of IPF twice or more within the past one year.

(11) Pulmonary infection occurred within one month before the first administration of the study drug.

(12) Screening for those who have a history of invasive or non-invasive mechanical ventilation within the past one month, or those who currently require oxygen therapy (oxygen therapy duration > 15 hours per day)

(13) Screening for those who smoked within the past three months or were unable to quit smoking during the trial period

(14) Those whose researchers judged that their expected survival period might be less than one year

(15) The laboratory test results meet the following criteria: any cause resulting in a white blood cell count lower than 3.5×109/L or neutrophils are lower than 1.5×109/L; Hemoglobin (HGB) ≤ 90 g/L; Fibrinogen (FIB) ≤ 0.5 × LLN; Alanine aminotransferase (ALT) > 2 × ULN, Aspartate aminotransferase (AST) > 2 × ULN, Total bilirubin (TBIL) > 1.5 × ULN, Direct bilirubin (DBIL) > 1.5 × ULN, Serum creatinine (Cr) > 1.5 × ULN

(16) There is evidence suggesting that the subjects currently have digestive system, urinary system, cardiovascular and cerebrovascular, hematological, nervous system, mental and metabolic diseases that may affect safety, such as severe kidney diseases requiring hemodialysis or peritoneal dialysis; advanced hepatitis or liver cirrhosis; severe heart failure (NYHA classification III and IV); poorly controlled hypertension (≥180/100 mmHg); and severe pulmonary heart disease or pulmonary hypertension that the researchers consider may affect the evaluation of the trial results.

(17) Having various malignant tumors or having a history of malignant tumors

(18) The 12-lead electrocardiogram shows severe arrhythmias (such as ventricular tachycardia, frequent supraventricular tachycardia, atrial fibrillation, atrial flutter, etc.) or second-degree and above atrioventricular conduction block.

(19) Those with positive results in Serological virology tests (HBsAg, HCV antibody, HIV antibody, Treponema pallidum antibody). Among them, hepatitis B virus carriers, stable hepatitis B patients after drug treatment (with DNA titer ≤ 2000 IU/mL or copy number < 1000 copies/mL), and cured hepatitis C patients (with negative HCV RNA test results) can be enrolled after being judged qualified by the investigators.

(20) Pregnant or lactating women, or those with a positive human chorionic gonadotropin β (β-HCG) test result during the screening period; or fertile male subjects and women of childbearing age who cannot or do not wish to take effective non-medical contraceptive measures during the study period and for the next 6 months after the study concludes.

(21) Researchers considered those who were not suitable for participation in this trial

1. **Withdrawal Criteria**

**2.1. Withdrawal Decision by the Investigator**

This refers to the situation where a participant who has been enrolled in the trial experiences circumstances that make it inappropriate to continue the trial, and the investigator decides that the case should be withdrawn from the trial.

(1) The participant has poor compliance, which affects the determination of safety and tolerance.

(2) The participant experiences adverse events, and the investigator deems it inappropriate for the participant to continue participating in the trial.

(3) The participant presents other situations that the investigator deems inappropriate for continuing to participate in the trial.

**2.2. Participant's Self-Withdrawal from the Trial**

(1) The participant has the right to withdraw from the trial at any time for any reason.

(2) Although the participant has not explicitly requested to withdraw from the trial, if they no longer follow the trial protocol for visits or receive the trial medication or cooperate with tests, and the investigator is unable to contact the participant at least 3 times during the visit period to the next visit period, the participant is counted as a lost to follow-up, and this type of loss is also considered as "withdrawal" (or "dropout").

**Dose-limiting toxicities (DLT)**: Adverse events of grade 3 or above that are drug-related (definitely related, probably related, possibly related) occurring in the subjects from the first administration of UC-MSCs to 28 days (4 weeks) after the last infusion are considered as dose-limiting toxicities (DLT). The severity of the adverse events observed during the trial are classified according to the NCI CTCAE 5.0 grading standard.

**Maximum tolerated dose (MTD)**: If one subject experiences DLT in a certain dose group, when moving to the next dose group according to the 3+3 principle; if one or more cases of DLT occur again, then the original planned dose increment will not be continued, and the previous dose group will be designated as MTD; if two or more subjects experience DLT, the climbing process will be terminated, and the previous dose group will be designated as MTD; if the maximum dose group (2×108 cells per person per time) still fails to clearly define MTD, the investigator and the sponsor will carefully analyze the obtained safety data and negotiate to decide whether to conduct higher-dose exploration.

**The table of enrolment, interventions, and assessments**

|  | Screening | Basrline | Treatment | | | | Follow-up | | | | |
| --- | --- | --- | --- | --- | --- | --- | --- | --- | --- | --- | --- |
| Visit/Time point (D/W) | D-28 ~D-1 | D-7 ~D-1 | D0 | D1 | D3 | D6 | W1  (±1d) | W4  (±3d) | W12  (±5d) | W24  (±7d) | Drop out early |
| Sign consent form | X |  |  |  |  |  |  |  |  |  |  |
| Check inclusion/exclusion criteria | X | X |  |  |  |  |  |  |  |  |  |
| Demographic information | X |  |  |  |  |  |  |  |  |  |  |
| Medical history and diagnosis | X |  |  |  |  |  |  |  |  |  |  |
| Symptoms and physical examination | X | X | X | X | X | X | X | X | X | X | X |
| Vital signs | X | X | X | X | X | X | X | X | X | X | X |
| Blood routine | X | X |  | X | X | X | X | X | X | X | X |
| Urine routine | X | X |  | X | X | X | X | X | X | X | X |
| Blood pregnancy test | X | X |  |  |  |  |  |  |  | X | X |
| Blood biochemistry | X | X |  | X | X | X | X | X | X | X | X |
| Blood gas analysis |  | X |  |  |  |  |  |  | X | X | X |
| Coagulation function | X | X |  | X | X | X | X |  | X | X | X |
| Myocardial enzyme | X |  |  |  |  |  |  |  |  | X | X |
| Antibody testing for autoimmune diseases | X |  |  |  |  |  |  |  |  | X | X |
| Lung tumor markers | X |  |  |  |  |  |  |  | X | X | X |
| Blood Transfusion Tests (Four Items) | X |  |  |  |  |  |  |  |  | X | X |
| Immune-related indicators |  | X |  | X | X | X | X | X | X |  | X |
| Blood proteomics analysis |  | X |  |  |  |  | X | X | X | X | X |
| 12-lead electrocardiogram | X | X |  | X | X | X | X | X |  | X | X |
| Chest HRCT | X |  |  |  |  |  |  |  | X | X | X |
| Pulmonary function (ventilation + diffusion)***** | X | X |  |  |  |  |  |  | X | X | X |
| Ultrasonic cardiogram | X |  | According to clinical requirements | | | | | | | | |
| 6-minute walk test |  | X |  |  |  |  | X | X | X | X | X |
| St. George's Respiratory Questionnaire (SGRQ) |  | X |  |  |  |  | X | X | X | X | X |
| Dyspnea scores |  | X |  |  |  |  | X | X | X | X | X |
| Cough score |  | X |  |  |  |  | X | X | X | X | X |
| Acute exacerbation of IPF | X | X | X | X | X | X | X | X | X | X | X |
| Treatment |  |  | X |  | X | X |  |  |  |  |  |
| Drug combination | X | X | X | X | X | X | X | X | X | X | X |
| Adverse event (AE) |  |  | X | X | X | X | X | X | X | X | X |
| Serious adverse event (SAE) |  |  | X | X | X | X | X | X | X | X | X |

*****Pulmonary function include forced vital capacity (FVC), forced expiratory volume in 1 second (FEV1), carbon monoxide diffusion capacity (DLCO) and alveolar ventilation (VA).
